# Supplementary material for: Fullerene-like MoSe2nanoparticles-embedded CNT balls with excellent structural stability for highly reversible sodium-ion storage
Source: Royal Society of Chemistry journal article supplement (doi:10.1039/c5nr07733h), 2016-01-01
Supplement: c5nr07733h1.pdf [file c5nr07733h1.pdf]

## **Supporting Information**

### **Fullerene-like MoSe<sub>2</sub> Nanoparticles–Embedded CNT Balls with Excellent Structural Stability for Highly Reversible Sodium-Ion Storage**

Seung Ho Choi and Yun Chan Kang\*

Department of Materials Science and Engineering, Korea University, Anam-Dong,  
Seongbuk-Gu, Seoul 136-713, Republic of Korea

\*Corresponding authors.

E-mail: yckang@korea.ac.kr. Tel.: +82-2-928-3584. Fax: +82-2-3290-3268.  
(Yun Chan Kang)

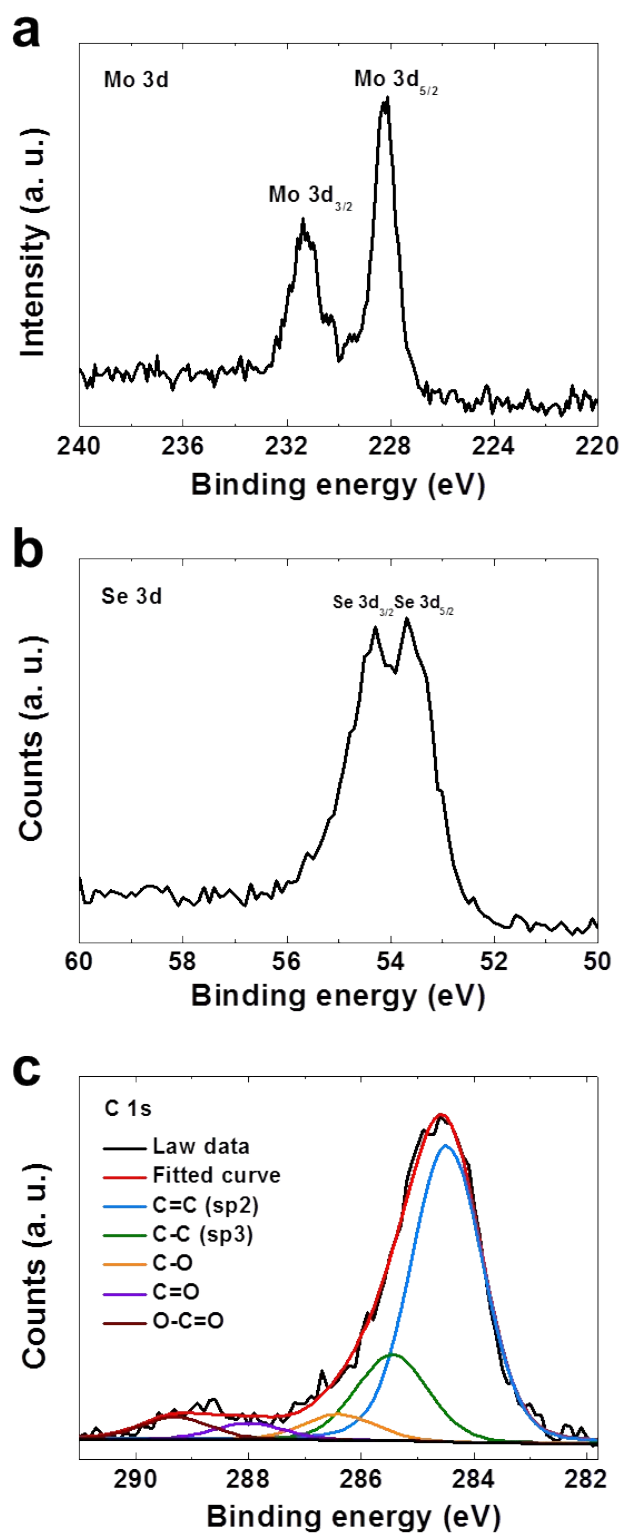

**Fig. S1** XPS spectra of the F-MoSe<sub>2</sub>/CNT composite balls.

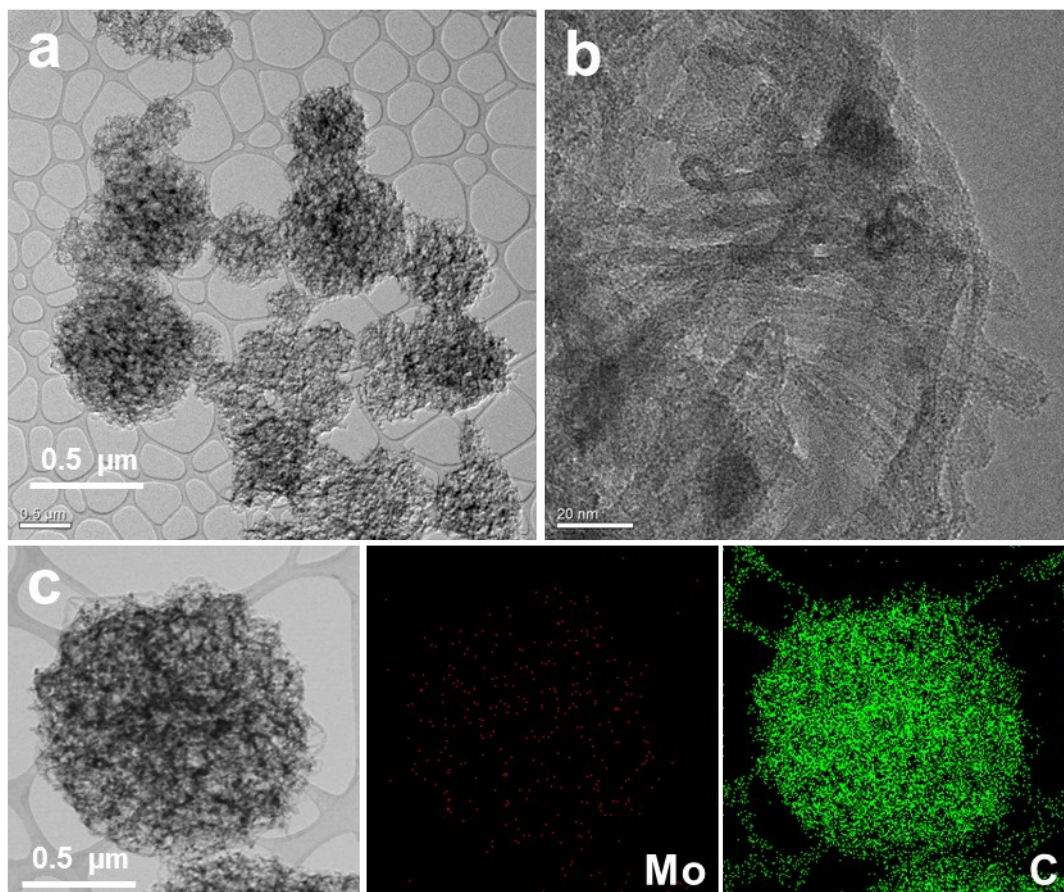

**Fig. S2** TEM and elemental mapping images of the CNT balls obtained after dissolution of MoO<sub>2</sub> by diluted hydrogen peroxide: a,b) TEM images and c) elemental mapping images of Mo and C components.

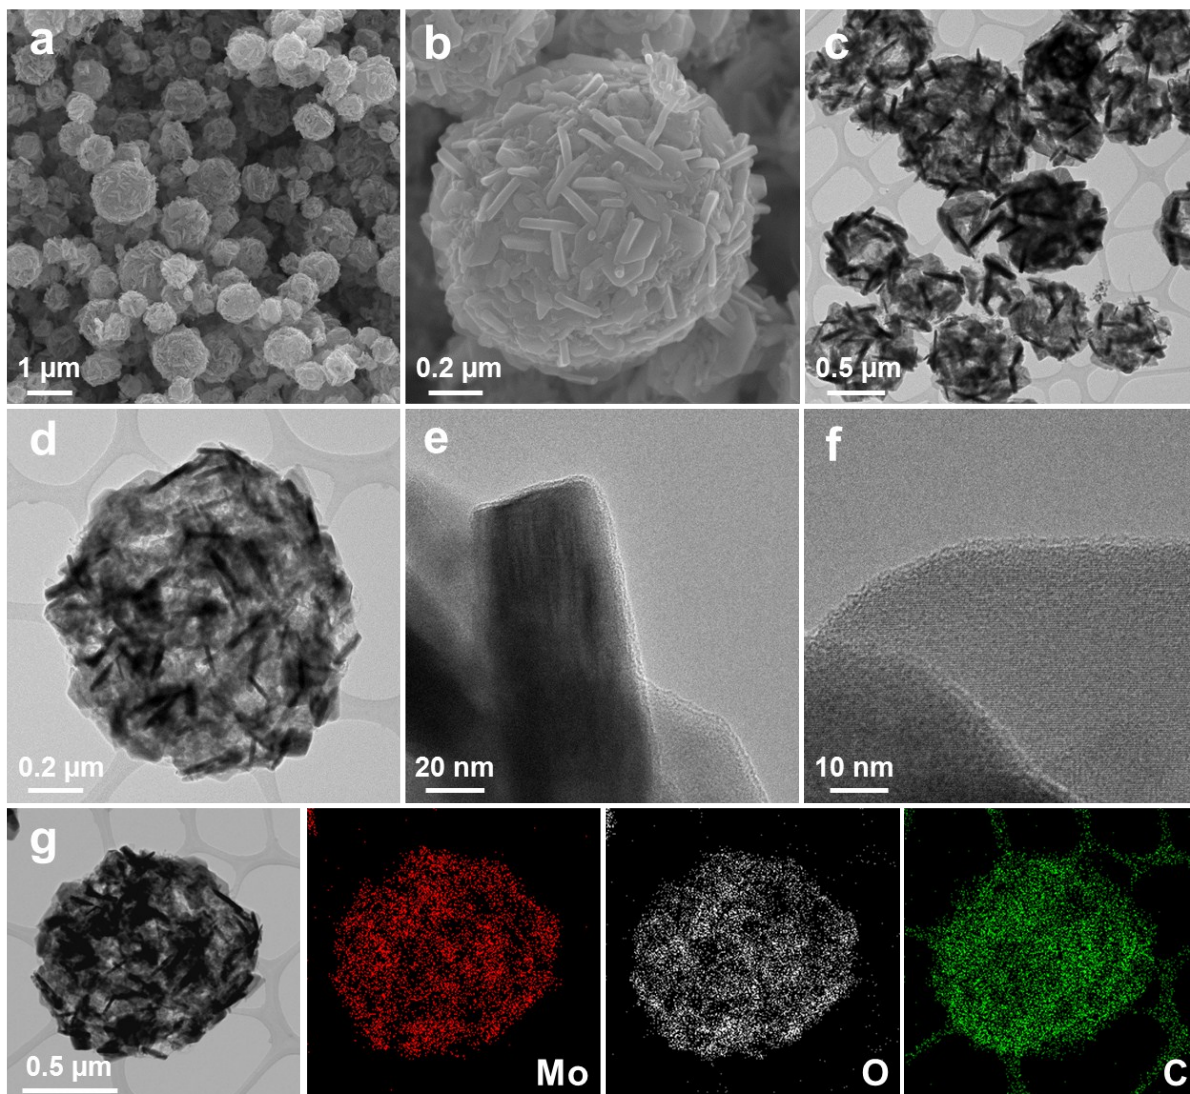

**Fig. S3** Morphologies of the MoO<sub>3</sub>/CNT composite balls prepared from the spray solution without PS nanobeads: a,b) FE-SEM images, c-e) TEM images, f) HR-TEM image, and g) elemental mapping images of Mo, O, and C components.

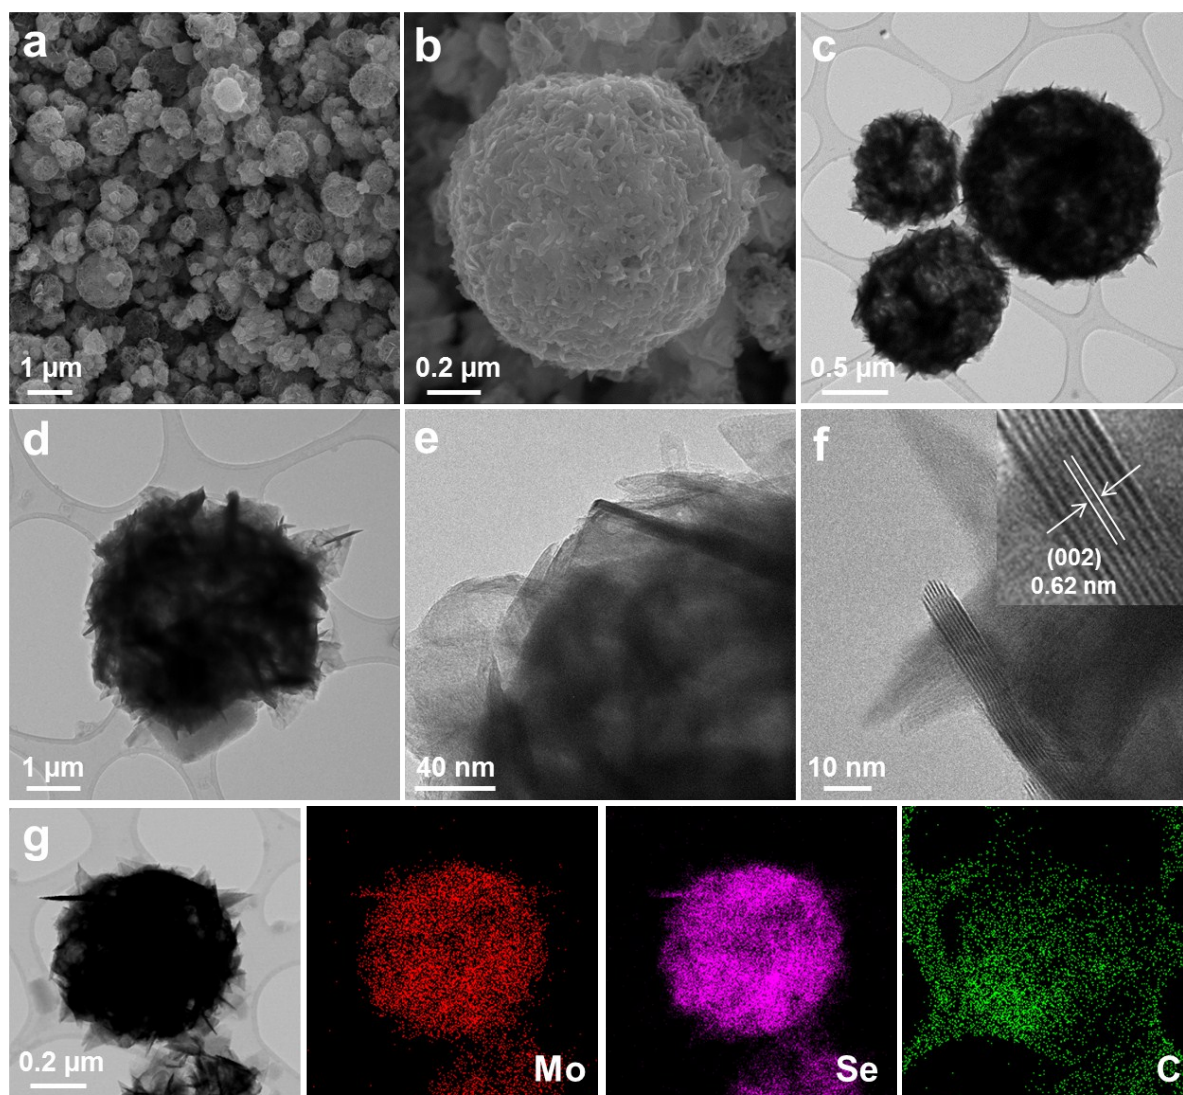

**Fig. S4** Morphologies of the N-MoSe<sub>2</sub>/CNT composite balls prepared by selenization process of the MoO<sub>3</sub>/CNT composite balls: a,b) FE-SEM images, c-e) TEM images, f) HR-TEM image, g) elemental mapping images of Mo, Se, and C components.

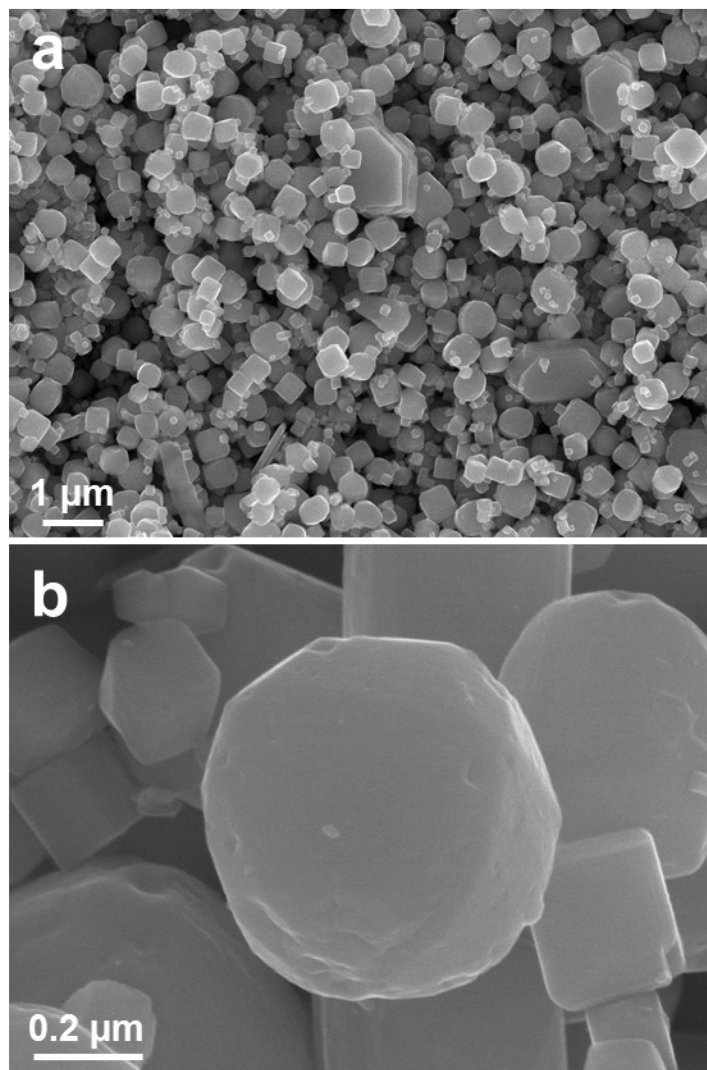

**Fig. S5** FE-SEM images of the bare MoO<sub>3</sub> powders prepared by spray pyrolysis.

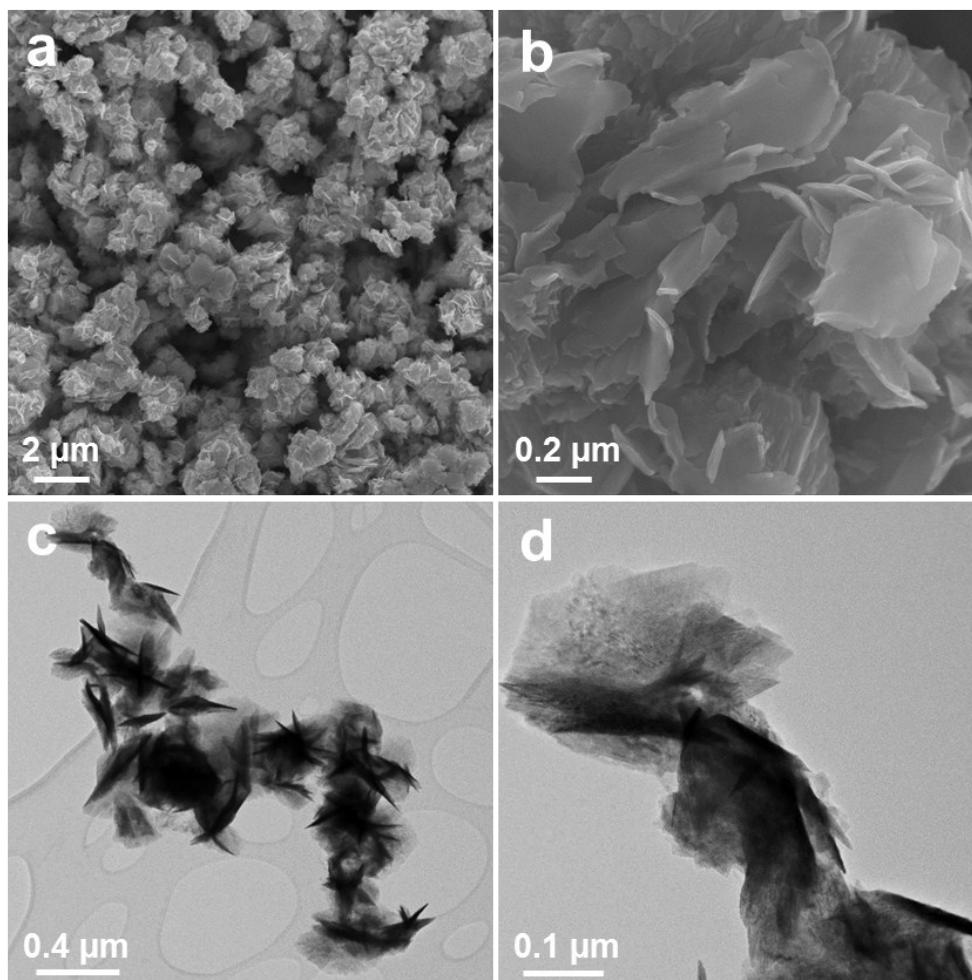

**Fig. S6** Morphologies of the ultrathin MoSe<sub>2</sub> nanosheets prepared by selenization process of bare MoO<sub>3</sub> powders: a,b) FE-SEM images and c,d) TEM images.

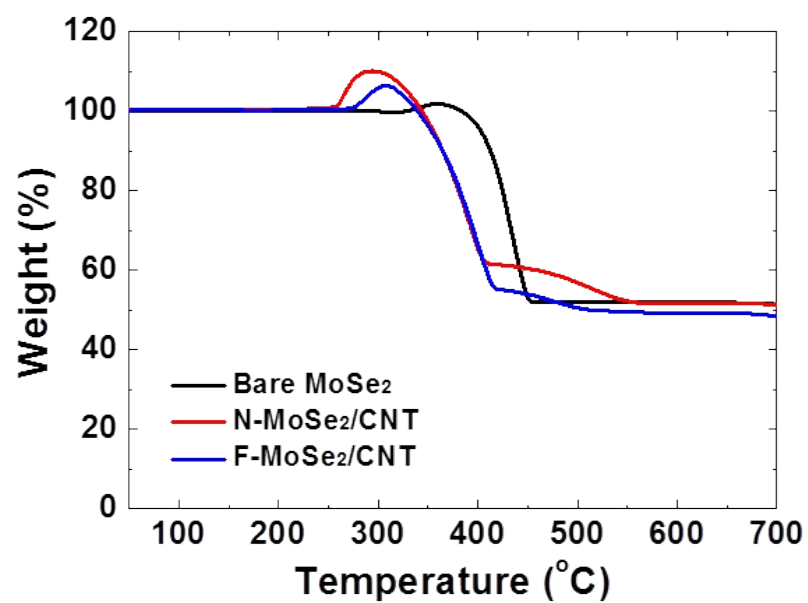

**Fig. S7** TG curves of the bare MoSe<sub>2</sub>, N-MoSe<sub>2</sub>/CNT, and F-MoSe<sub>2</sub>/CNT composite balls prepared by spray pyrolysis and selenization processes.



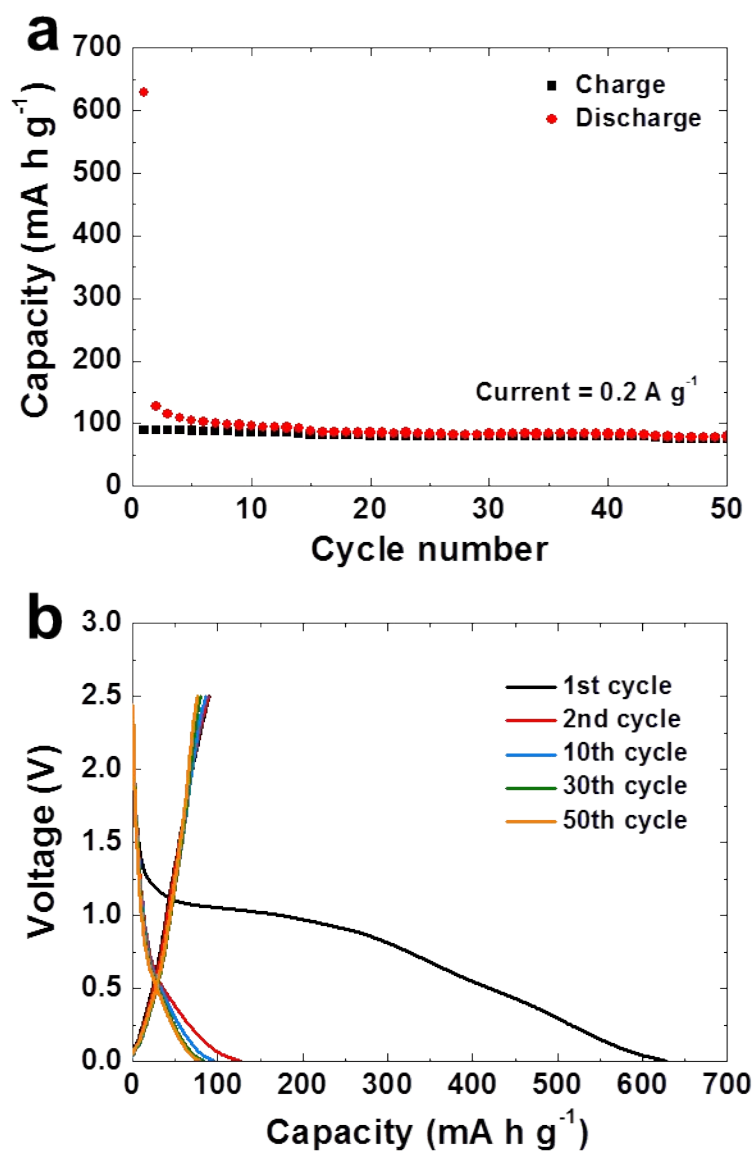

**Fig. S8** Na-ion storage properties of the porous CNT balls: a) cycling performance and b) cycle profiles.

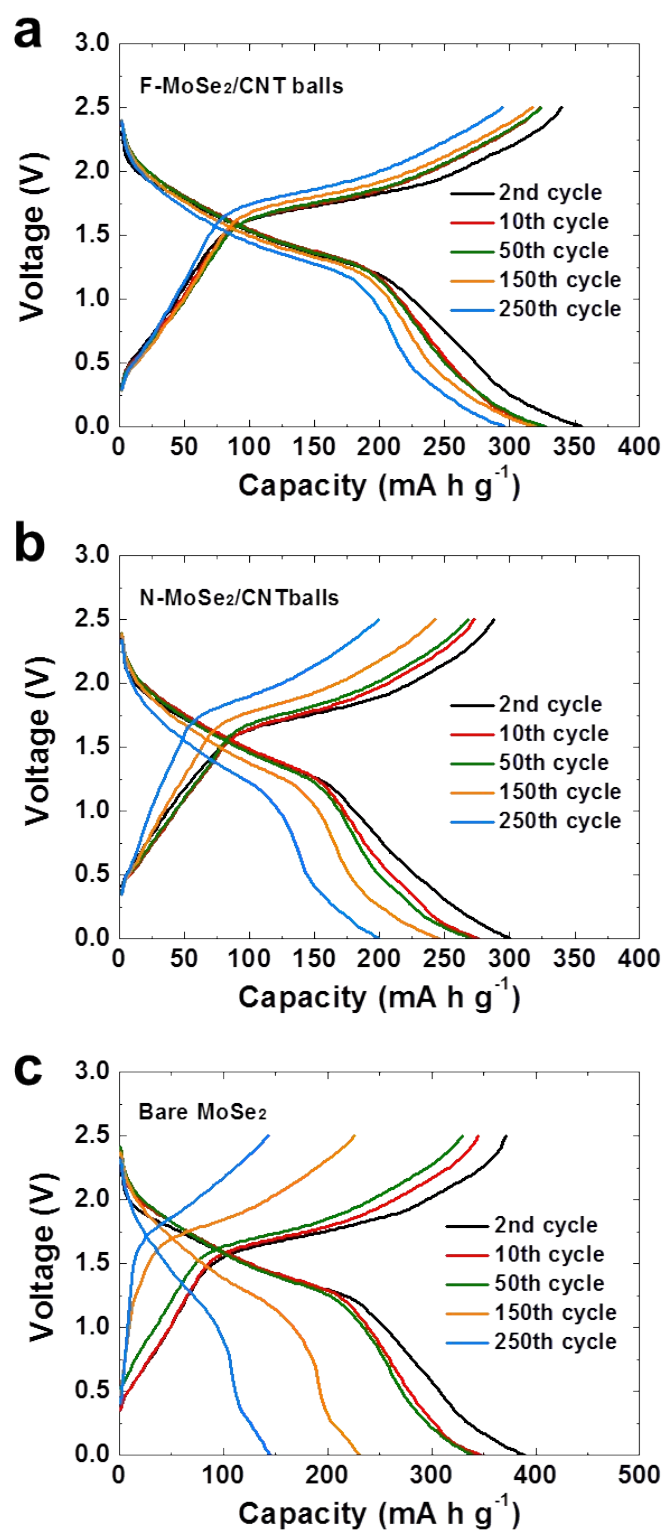

**Fig. S9** Cycle profiles of all samples: a) F-MoSe<sub>2</sub>/CNT composite balls, b) N-MoSe<sub>2</sub> /CNT composite balls, and c) bare MoSe<sub>2</sub> nanosheets.

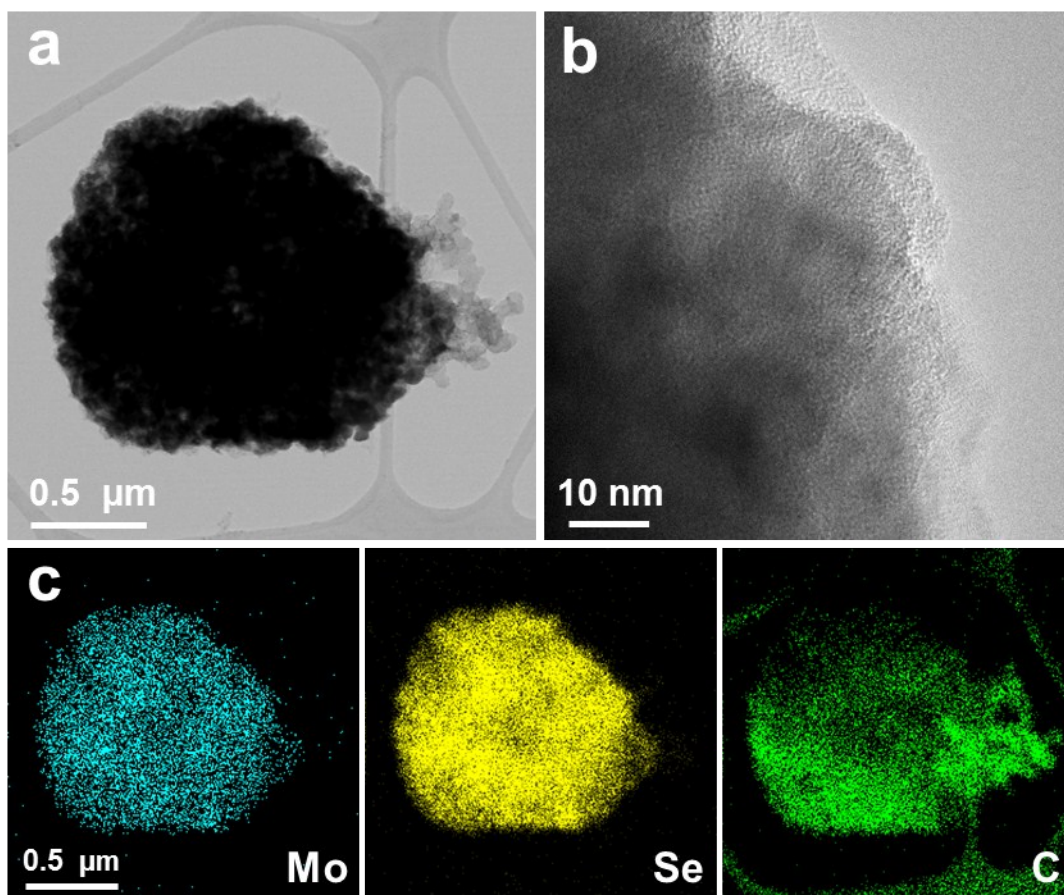

**Fig. S10** Morphologies and elemental mapping images of the F-MoSe<sub>2</sub>/CNT composite balls obtained after 250 cycles: a,b) TEM images and c) elemental mapping images of Mo, Se, and C components.

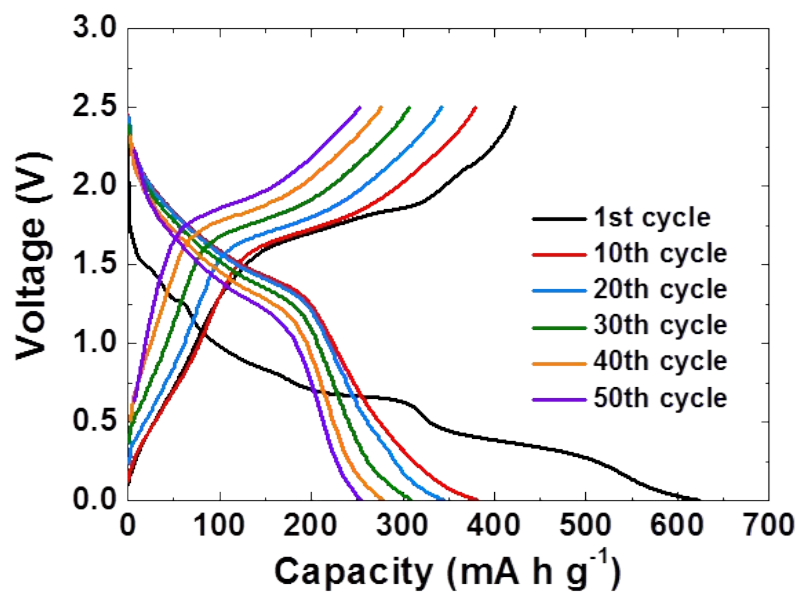

**Fig. S11** Cycle profile of the rate performances of the F-MoSe<sub>2</sub>/CNT composite balls.

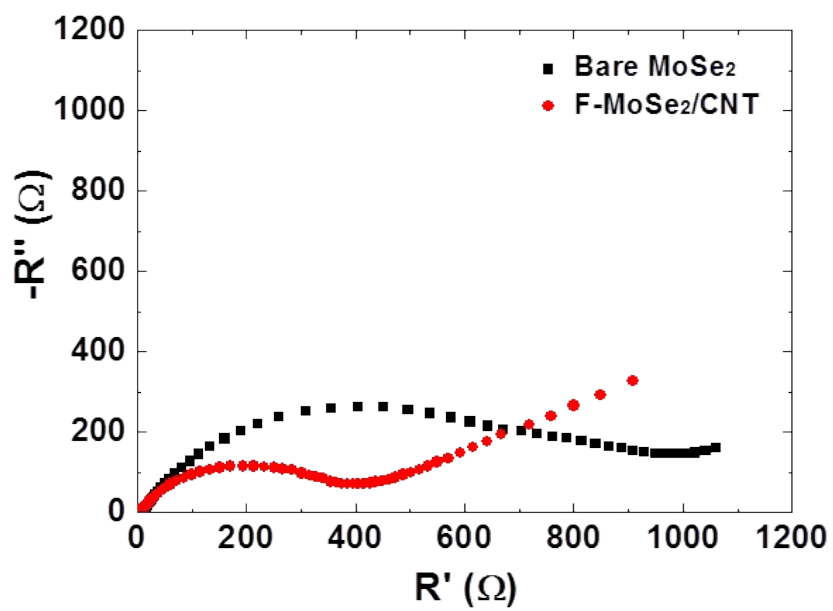

**Fig. S12** EIS spectra of bare MoSe<sub>2</sub> and F-MoSe<sub>2</sub>/CNT composite microspheres before cycling.

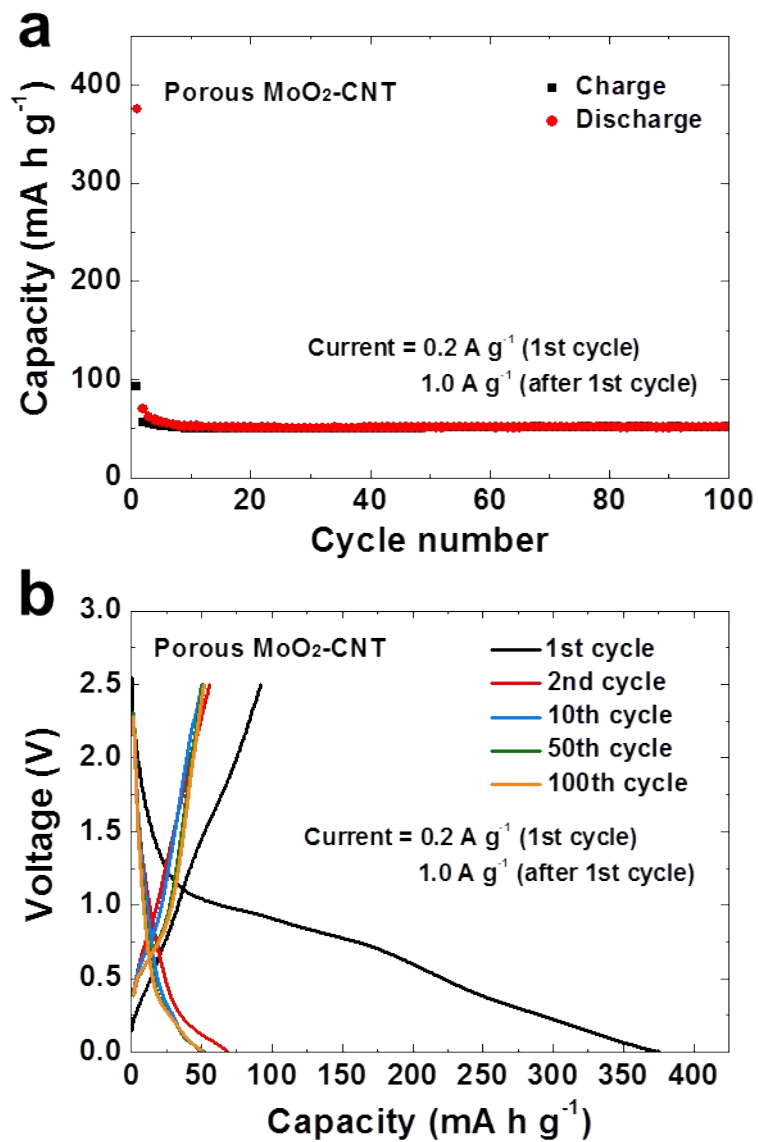

**Fig. S13** Na-ion storage properties of  $\text{MoO}_2/\text{CNT}$  composite balls.

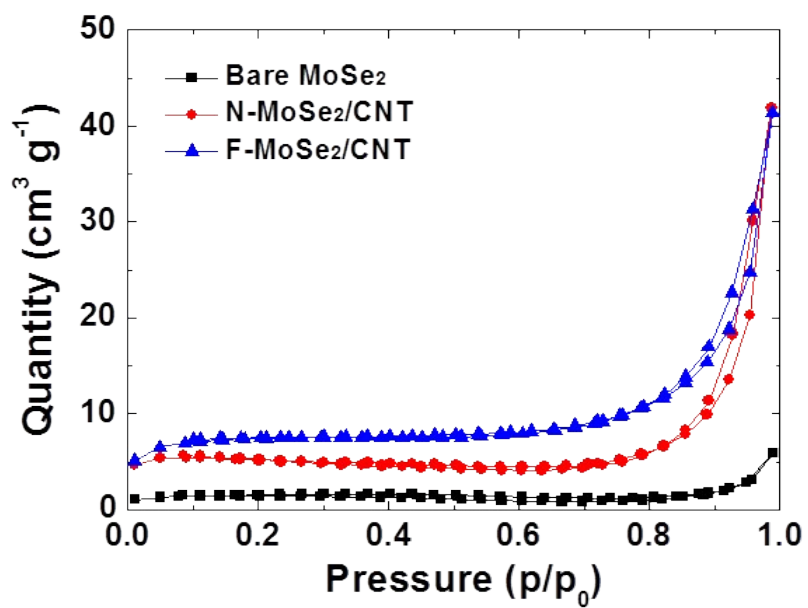

**Fig. S14** N<sub>2</sub> adsorption-desorption isotherms measured at 77 K for the bare MoSe<sub>2</sub>, N-MoSe<sub>2</sub>/CNT, and F-MoSe<sub>2</sub>/CNT composite powders.
